# Supplementary material for: Clinical Characteristics and Outcomes in Adults with Anti-IFN-γ Autoantibody-Associated Immunodeficiency and Skeletal Involvement: A 10-Year Retrospective Cohort Study
Source: Research Square preprint supplement (doi:10.21203/rs.3.rs-8542097/v1), 2026-02-05
Supplement: Supplementary file 1 [file 2b97fe55b83d429a585e0189.docx]

| Supplementary Table 2 Symptoms, time of diagnosis, pathogens, imaging findings, surgical operation, and postoperative pathology/pathogens in 20 patients with bone involvement | | | | | | | |
| --- | --- | --- | --- | --- | --- | --- | --- |
| Patient | Initial symptoms1 | Symptoms2 | Time3 | Pathogens# | Imaging4 | Surgical operation | Postoperative pathology/pathogens |
| P1 | 2 | 1 | 2021-9 | TM (2021-2) | 1 | Lesion excision and drainage | Atypical granuloma |
|  |  |  |  | TM, NTM, MTB (2021-8) |  |  | Culture (lesion)：TM |
| P2 | 3 | 1 | 2023-1 | NTM (2021-8, 2022-11) | 1,3 | Lesion excision + Bone grafting + Plate internal fixation | Granulomatous inflammation |
|  |  |  |  | TM (2023-1) |  |  | Culture (lesion)：TM |
| P3 | 3 | 1 | 2021-7 | TM (2020-10) | 1,2,6 | 1, Screw internal fixation | Chronic suppurative inflammation |
|  |  |  |  | NTM (2021-6) |  | 2, Lesion excision + Bone grafting + Plate internal fixation | Culture (osseous tissue)：TM |
| P4 | 5 | 1 | 2021-1 | TM (2020-12) | 1,3 | Right total hip arthroplasty | Avascular necrosis of the femoral head |
| P5 | 3 | 1 | 2021-2 | NTM (2021-2) | 1 | Vertebroplasty with biopsy | No definite evidence of tumor |
|  |  |  |  | TM NTM(2021-5) |  |  |  |
| P6 | 2 | 1 | 2023-4 | TM (2017-5) | 5 | Lesion excision | Acid-fast staining (+), Tuberculosis considered |
|  |  |  |  | NTM (2023-4) |  |  |  |
| P7 | 1,2,4 | 1 | 2025-2 | TM (2019-1, 2021-12) | 1 | Lesion excision with internal fixation | Post-fracture changes |
|  |  |  |  | Salmonella (2024-1, 2024-8) |  |  |  |
| P8 | 1,2,5 | 1 | 2018-4 | TM (2018-4) | 3,4 | Cemented vertebroplasty with puncture biopsy | Bone marrow fibrosis |
| P9 | 1,2 | 1 | 2022-9 | NTM (2022-7) | 1,3 | Lesion excision + Iliac bone graft fusion | Chronic suppurative inflammation |
|  |  |  |  | TM NTM(2022-10) |  |  | Cultivate (pelvic tissue)：TM |
| P10 | 1,3 | 1 | 2023-1 | NTM (2023-02) | 3,5 | Vertebroplasty + Thoracic vertebra puncture biopsy | Chronic suppurative osteomyelitis |
|  |  |  |  | TM (2024-8) |  |  | NGS (osseous tissue): NTM |
| P11 | 4,5 | 1 | 2023-11 | NTM (2022-08, 2022-09) | 1,6 | Lumbar internal fixation | Lumbar tuberculosis considered |
|  |  |  |  |  |  |  |  |
| P12 | 3 | 1 | 2024-7 | NTM (2024-07) | 2,5 | Lesion excision with biopsy | Chronic granulomatous inflammation |
|  |  |  |  |  |  |  | NGS (Sternal tissue)：NTM |
| P13 | 2 | 1 | 2024-10 | NTM (2023-10) | 1 | Lesion excision | NGS (cervical vertebra)：TM |
|  |  |  |  | TM (2024-10) |  |  |  |
| P14 | 1,2 | 1 | 2021-2 | NTM (2021-03) | 2 | Bone marrow puncture + mass puncture biopsy | Chronic granulomatous inflammation |
|  |  |  |  |  |  |  | Culture (bone marrow): Mycobacterium |
| P15 | 2 | 1 | 2022-6 | TM (2021-8) | 2,4 | Bone marrow aspiration and biopsy | NGS(Bone Marrow )：NTM |
|  |  |  |  | NTM (2022-6, 2022-7) |  |  |  |
| P16 | 1,2 | 1 | 2022-2 | TM (2022-2) | 1,3,4 | Bone marrow aspiration and biopsy | Reactive myelogram |
|  |  |  |  |  |  |  | Culture (bone marrow): TM |
| P17 | 2 | 1 | 2022-5 | TM (2020-11) | 1 | Bone marrow aspiration and biopsy | Reactive myelogram |
|  |  |  |  | Salmonella (2022-8) |  |  | Culture (bone marrow): Salmonella |
| P18 | 2 | 0 | 2024-5 | NTM (2024-5) | 1 | Bone marrow aspiration and biopsy | NGS (osseous tissue): NTM |
| P19 | 1,2 | 0 | 2015-5 | TM (2015-05)  NTM TM(2015-7) | 5 | Bone marrow aspiration and biopsy | Chronic suppurative osteomyelitis |
| P20 | 2 | 0 | 2023-8 | NTM (2023-8) | 3,5 | Bone marrow aspiration and biopsy | Chronic granulomatous inflammation |
|  |  |  |  |  |  |  | NGS (osseous tissue): NTM |
| Initial symptoms1: symptoms at the initial visit of patients with positive AIGAs.  Symptoms2: do patients have symptoms of bone involvement, such as bone pain, swelling, or masses? (1 = yes, 0 = no)  Time3: the time of diagnosis of bone involvement.  Imaging4: imaging findings: 1 = Bone infection, 2 = Bone destruction, 3 = Fracture, 4 = Osteoporosis, 5 = Bone tumor? /Bone metastasis? 6 = Metal internal fixation shadow.  Pathogens#: patients with previously confirmed MTB infection: P4, P6, P8, P10, P11, P14.  TM: Talaromyces marneffei; NTM: non-tuberculous mycobacteria; MTB: mycobacterium tuberculosis; NGS: next-generation sequencing | | | | | | | |
