# Supplementary material for: Clinical Characteristics and Outcomes in Adults with Anti-IFN-γ Autoantibody-Associated Immunodeficiency and Skeletal Involvement: A 10-Year Retrospective Cohort Study
Source: Research Square preprint supplement (doi:10.21203/rs.3.rs-8542097/v1), 2026-02-05
Supplement: Supplementary file 2 [file 992d2a0eff78095a63e086ae.docx]

| Supplementary Table 1 Imaging findings suggestive of bone involvement in 103 patients with AIGAs | | | | |
| --- | --- | --- | --- | --- |
|  | Imaging modality | Imaging features | n / (%) |  |
|  | Bone ECT scan |  | 103 |  |
|  |  | Abnormal increased uptake | 103(100%) |  |
|  |  | Bone destruction | 65(63.11%) |  |
|  |  | Osteolytic destruction | 14(13.59%) |  |
|  |  | Compressive destruction | 3(2.91%) |  |
|  |  | Osteoblastic destruction | 2(1.94%) |  |
|  | Chest CT scan |  | 103 |  |
|  |  | Bone destruction (Thoracic vertebrae, Ribs, Sternum) | 65(63.11%) |  |
|  | PET-CT |  | 15 |  |
|  |  | Bone destruction | 14 |  |
| ECT: Emission Computed Tomography, CT: Computed Tomography,  PET-CT: Positron Emission Tomography-Computed Tomography | | | | |
